# Supplementary material
Source: PubMed Central journal article supplement (PMC6142978)
Supplement: jamaophthalmol-136-1017-s001.pdf [file jamaophthalmol-136-1017-s001.pdf]

## Supplementary Online Content

Wang SK, Guo Y, Liao C, et al. Incidence of and factors associated with myopia and high myopia in Chinese children, based on refraction without cycloplegia. *JAMA Ophthalmol*. Published online July 5, 2018. doi:10.1001/jamaophthalmol.2018.2658

**eFigure 1.** Mean height and weight by grade.

**eFigure 2.** Mean corneal radius of curvature and AL/CRC ratio by grade.

**eFigure 3.** Survival analysis for incident myopia by grade.

This supplementary material has been provided by the authors to give readers additional information about their work.

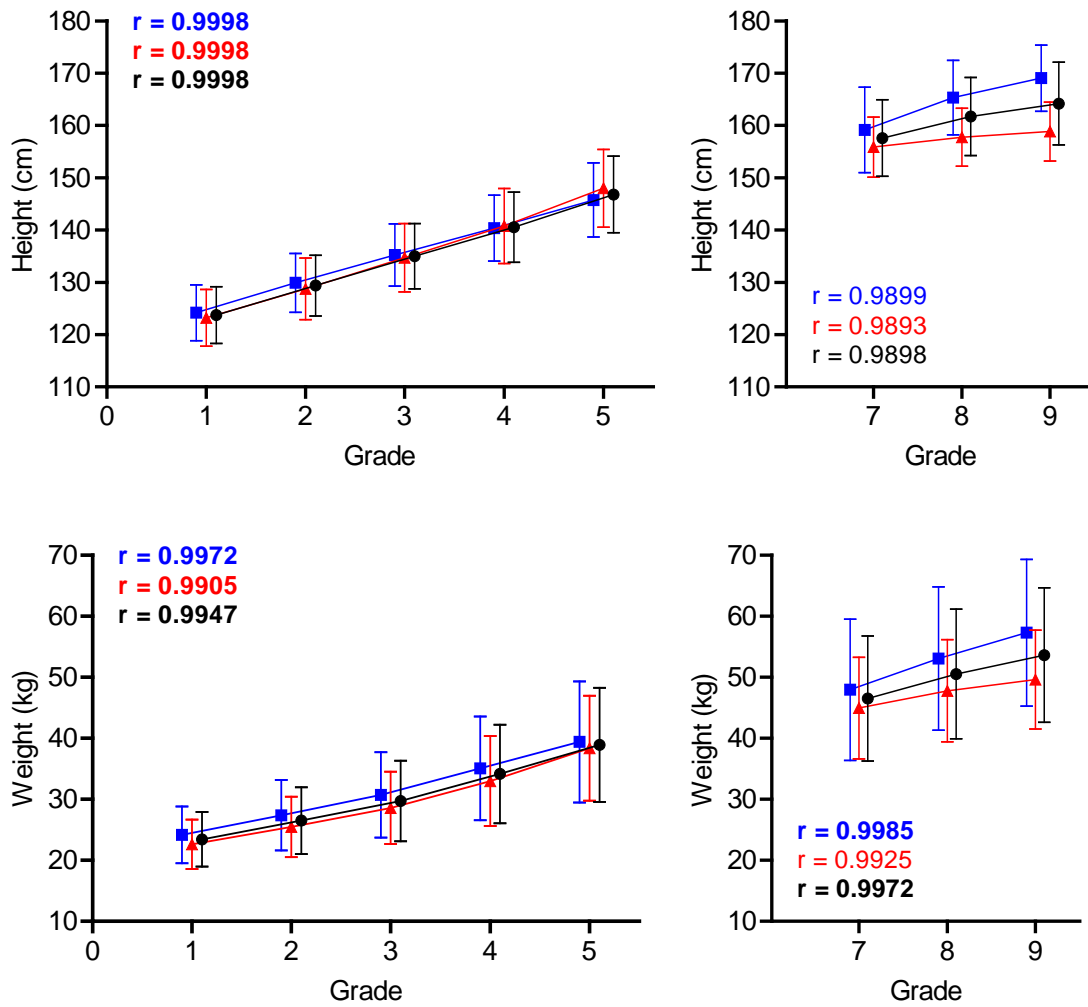

**eFigure 1. Mean height and weight by grade.**

Mean annual measures of height and weight in the primary (grade 1-6) and junior high school (grade 7-9) cohorts, with sub-analyses by sex. Measures were not available for grade 6. Error bars depict SD. Values for r denote Pearson's correlation coefficient for boys (blue), girls (red), and all subjects (black), with correlations fulfilling  $P < .05$  shown in bold.

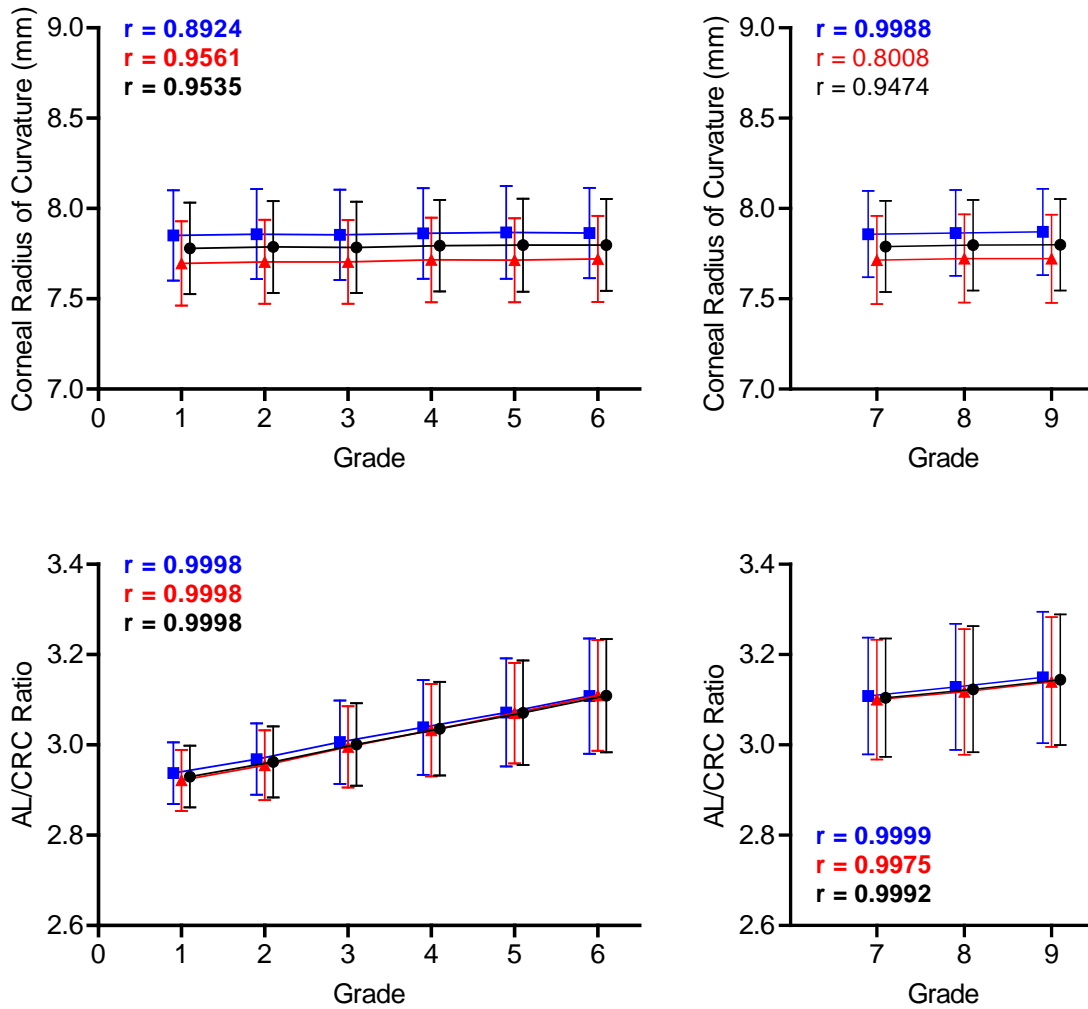

**eFigure 2. Mean corneal radius of curvature and AL/CRC ratio by grade.**

Mean annual measures of corneal radius of curvature and the ratio of axial length to corneal radius of curvature (AL/CRC) in the primary (grade 1-6) and junior high school (grade 7-9) cohorts, with sub-analyses by sex. Error bars depict SD. Values for r denote Pearson's correlation coefficient for boys (blue), girls (red), and all subjects (black), with correlations fulfilling  $P < .05$  shown in bold.

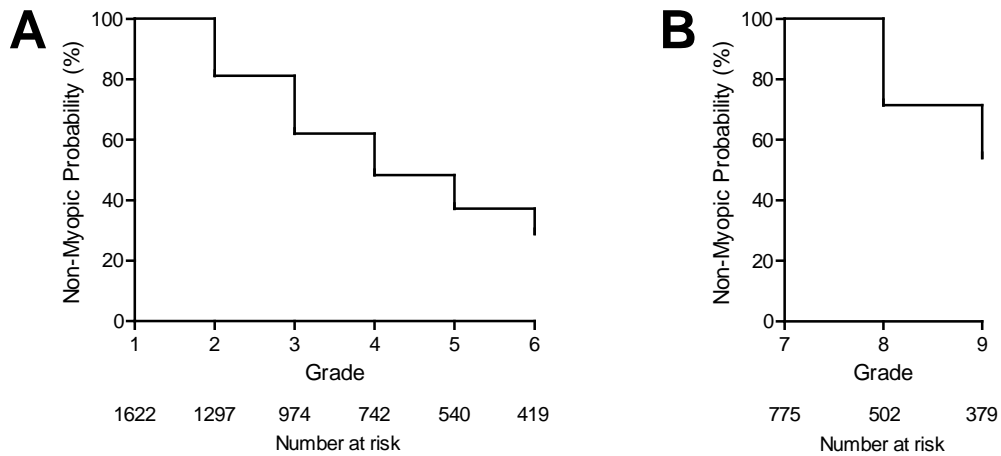

**eFigure 3. Survival analysis for incident myopia by grade.**

Survival analyses for incident myopia in the primary school (A) and junior high school (B) cohorts displaying probability of remaining non-myopic over time. Analyses include all subjects which were non-myopic (SER >−0.50 D) at baseline (grades 1 and 7).
